# Supplementary material for: Evaluation in a Cytokine Storm Model In Vivo of the Safety and Efficacy of Intravenous Administration of PRS CK STORM (Standardized Conditioned Medium Obtained by Coculture of Monocytes and Mesenchymal Stromal Cells)
Source: MDPI journal article supplement (doi:10.3390/biomedicines10051094), 2022-05-08
Supplement: s1 [file s1]

**Table S2.** Values of biochemical profile from mice sera.

|                       | <i>Alkaline phosphatase (U/l)</i> | <i>Alanine aminotransferase (U/l)</i> | <i>γ-glutamyl-transferase (U/l)</i> | <i>Biliary acid (umol/l)</i> | <i>Bilirubin (umol/l)</i> | <i>Albumin (g/l)</i> | <i>Blood urea nitrogen (mmol/l)</i>      | <i>Cholesterol (mmol/l)</i> |
|-----------------------|-----------------------------------|---------------------------------------|-------------------------------------|------------------------------|---------------------------|----------------------|------------------------------------------|-----------------------------|
| <i>Standard value</i> | 39+/-25.7 CD1;<br>59+/-C57        | 99+/-86.3 CD1;<br>41.1+/-16.4 C57     | UNK                                 | UNK                          | 11.973 +/-3.25            | 31.7 +/-4.7          | 13.57 +/-7.179 CD1;<br>11.67 +/-1.25 C57 | 3.89 +/-0.773               |
| 16<br>Day 0           | 36.00                             | 78.00                                 | 5.00                                | 0.00                         | 6.00                      | 38.00                | 9.60                                     | 4.00                        |
| 17<br>Day 0           | 33.33                             | 55.56                                 | 5.56                                | 0.00                         | 6.67                      | 37.78                | 11.56                                    | 4.22                        |
| 22<br>Day 0           | 26.92                             | 215.38                                | 4.81                                | 0.96                         | 5.77                      | 36.54                | 9.81                                     | 4.23                        |
| 23<br>Day 0           | 84.44                             | 157.78                                | 5.56                                | 0.00                         | 6.67                      | 28.89                | 7.33                                     | 3.33                        |
| 25<br>Day 0           | 64.44                             | 35.56                                 | 5.56                                | 0.00                         | 6.67                      | 11.11                | 6.00                                     | 3.33                        |
| 26<br>Day 0           | 31.43                             | 71.43                                 | 7.14                                | 0.00                         | 8.57                      | 48.57                | 8.57                                     | 4.57                        |
| 27<br>Day 0           | 70.00                             | 288.00                                | 5.00                                | 0.00                         | 8.00                      | 28.00                | 5.60                                     | 3.60                        |
| 16                    | 26.09                             | 34.78                                 | 10.87                               | 0.00                         | 13.04                     | 21.74                | 5.22                                     | 5.22                        |
| 17                    | 38.00                             | 86.00                                 | 5.00                                | 1.00                         | 6.00                      | 40.00                | 6.60                                     | 5.20                        |
| 18                    | 35.71                             | 70.00                                 | 3.57                                | 62.86                        | 4.29                      | 40.00                | 5.14                                     | 5.57                        |
| 19                    | 78.00                             | 30.00                                 | 5.00                                | 0.00                         | 6.00                      | 32.00                | 5.40                                     | 5.00                        |
| 20                    | 7.58                              | 27.27                                 | 7.58                                | 0.00                         | 6.06                      | 30.30                | 4.85                                     | 5.76                        |
| 21                    | 75.00                             | 52.08                                 | 5.21                                | 93.75                        | 6.25                      | 31.25                | 4.79                                     | 5.63                        |
| 22                    | 84.21                             | 57.89                                 | 6.58                                | 1.32                         | 13.16                     | 13.16                | 6.32                                     | 4.74                        |
| 23                    | 66.67                             | 50.00                                 | 8.33                                | 0.00                         | 10.00                     | 16.67                | 7.67                                     | 5.00                        |
| 24                    | 77.50                             | 130.00                                | 6.25                                | 2.50                         | 7.50                      | 32.50                | 5.25                                     | 5.00                        |
| 25                    | 45.00                             | 42.50                                 | 6.25                                | 1.25                         | 5.00                      | 32.50                | 5.50                                     | 5.75                        |
| 26                    | 42.11                             | 26.32                                 | 4.39                                | 0.00                         | 5.26                      | 38.60                | 6.67                                     | 5.44                        |
| 27                    | 51.43                             | 65.71                                 | 7.14                                | 0.00                         | 11.43                     | 14.29                | 4.86                                     | 4.86                        |
| 28                    | 57.50                             | 390.00                                | 6.25                                | 45.00                        | 7.50                      | 30.00                | 5.50                                     | 4.25                        |
| 29                    | 94.29                             | 48.57                                 | 7.14                                | 1.43                         | 8.57                      | 14.29                | 4.86                                     | 5.14                        |
| 30                    | 42.11                             | 68.42                                 | 6.58                                | 0.00                         | 7.89                      | 31.58                | 6.58                                     | 5.26                        |
