# Supplementary material for: Evaluation in a Cytokine Storm Model In Vivo of the Safety and Efficacy of Intravenous Administration of PRS CK STORM (Standardized Conditioned Medium Obtained by Coculture of Monocytes and Mesenchymal Stromal Cells)
Source: MDPI journal article supplement (doi:10.3390/biomedicines10051094), 2022-05-08
Supplement: s1 [file s1]

**Tabla S4.** Values of human cytokines analyzed by multiplex assay.

| <i>Sample</i>                | <i>TNF-<math>\alpha</math></i> | <i>IL-6</i> | <i>IL-10</i> | <i>IL-1<math>\beta</math></i> | <i>IFN<math>\gamma</math></i> | <i>IL-1RA</i> | <i>IL-12 p70</i> | <i>HGF</i> |
|------------------------------|--------------------------------|-------------|--------------|-------------------------------|-------------------------------|---------------|------------------|------------|
| 16                           | 4.353                          | 2.492       | N/A          | < 15.761                      | 16.589                        | N/A           | 50.884           | 6.291      |
| 17                           | 3.410                          | 2.153       | N/A          | < 15.761                      | 17.457                        | 105.010       | 63.737           | 7.748      |
| 18                           | 3.099                          | 2.237       | < 4.033      | < 15.761                      | 17.457                        | 13.938        | 60.530           | 7.754      |
| 19                           | 3.880                          | 2.153       | N/A          | < 15.761                      | 19.194                        | < 26.132      | 57.318           | 6.291      |
| 20                           | 3.571                          | 1.901       | N/A          | < 15.761                      | 17.457                        | 2.781         | 50.900           | 7.748      |
| 21                           | 3.566                          | 2.153       | < 4.033      | < 15.761                      | 15.720                        | 8.360         | 44.465           | 6.258      |
| 22                           | 3.723                          | 2.153       | N/A          | < 15.761                      | 15.719                        | 82.099        | 57.318           | 7.748      |
| 23                           | 3.723                          | 1.984       | < 4.033      | < 15.761                      | 15.720                        | 2.781         | 63.725           | 6.291      |
| 24                           | 4.040                          | 2.153       | N/A          | < 15.761                      | 13.982                        | 5.923         | 54.111           | 7.748      |
| 25                           | 3.410                          | 2.321       | < 4.033      | < 15.761                      | 10.502                        | < 26.132      | 50.900           | 4.800      |
| 26                           | 3.413                          | 1.986       | < 4.033      | < 15.761                      | 12.243                        | 2.781         | 50.884           | 6.291      |
| 27                           | 3.723                          | 2.068       | < 4.033      | < 15.761                      | 13.982                        | 50.092        | 63.725           | 7.748      |
| 28                           | 3.880                          | 2.321       | 8.244        | < 15.761                      | 16.588                        | 8.360         | 57.318           | 6.291      |
| 29                           | 3.566                          | 1.984       | < 4.033      | < 15.761                      | 15.720                        | 225.939       | 57.318           | 6.291      |
| 30                           | 3.723                          | 2.321       | < 4.033      | < 15.761                      | 20.929                        | N/A           | 50.900           | 6.258      |
| <i>Limit detection value</i> | UNK                            | UNK         | 4.033        | 15.761                        | UNK                           | 26.132        | UNK              | UNK        |

Values "< X" are under limit detection and are represented in the graphics as that "X" exact number. N/A means that the value is either non valid or under detection limit; therefore, it was represented as half the detection limit value for each cytokine/growth factor
