# Supplementary material for: Evaluation in a Cytokine Storm Model In Vivo of the Safety and Efficacy of Intravenous Administration of PRS CK STORM (Standardized Conditioned Medium Obtained by Coculture of Monocytes and Mesenchymal Stromal Cells)
Source: MDPI journal article supplement (doi:10.3390/biomedicines10051094), 2022-05-08
Supplement: s1 [file s1]

|                      |                    | IRWIN TEST            |   |   |   |      |                     |   |   |   |    |                   |    |    |    |    |                   |    |    |    |    |                           |    |    |    |    |                                    |    |    |    |    |                            |    |    |    |    |  |  |  |  |  |      |  |  |  |
|----------------------|--------------------|-----------------------|---|---|---|------|---------------------|---|---|---|----|-------------------|----|----|----|----|-------------------|----|----|----|----|---------------------------|----|----|----|----|------------------------------------|----|----|----|----|----------------------------|----|----|----|----|--|--|--|--|--|------|--|--|--|
|                      |                    | STANDARD              |   |   |   |      | SLIGHT DECREASE     |   |   |   |    | MODERATE DECREASE |    |    |    |    | HIGH DECREASE     |    |    |    |    | DEAD                      |    |    |    |    |                                    |    |    |    |    |                            |    |    |    |    |  |  |  |  |  |      |  |  |  |
|                      |                    | SLIGHT INCREASE       |   |   |   |      | MODERATE INCREASE   |   |   |   |    | HIGH INCREASE     |    |    |    |    |                   |    |    |    |    |                           |    |    |    |    |                                    |    |    |    |    |                            |    |    |    |    |  |  |  |  |  |      |  |  |  |
|                      |                    | CONTROL GROUP (BASAL) |   |   |   |      | CONTROL GROUP (PBS) |   |   |   |    | LPS               |    |    |    |    | LPS+Gold Standard |    |    |    |    | LPS+PRS CK STORM low dose |    |    |    |    | LPS+PRS CK STORM intermediate dose |    |    |    |    | LPS+PRS CK STORM high dose |    |    |    |    |  |  |  |  |  |      |  |  |  |
| Temperature [°C]     |                    | 1                     | 2 | 3 | 4 | 5    | 6                   | 7 | 8 | 9 | 10 | 11                | 12 | 13 | 14 | 15 | 16                | 17 | 18 | 19 | 20 | 21                        | 22 | 23 | 24 | 25 | 26                                 | 27 | 28 | 29 | 30 | 31                         | 32 | 33 | 34 | 35 |  |  |  |  |  |      |  |  |  |
| Pre-treatment        |                    |                       |   |   |   |      |                     |   |   |   |    |                   |    |    |    |    |                   |    |    |    |    |                           |    |    |    |    |                                    |    |    |    |    |                            |    |    |    |    |  |  |  |  |  |      |  |  |  |
| 20 minutes after LPS |                    | -                     | - | - | - | -    | -                   | - | - | - | -  | 38.1              |    |    |    |    |                   |    |    |    |    | 34.2                      |    |    |    |    |                                    |    |    |    |    | 35.1                       |    |    |    |    |  |  |  |  |  | 35.2 |  |  |  |
| 48 hours after LPS*  |                    |                       |   |   |   | 37.2 |                     |   |   |   |    |                   |    |    |    |    |                   |    |    |    |    |                           |    |    |    |    |                                    |    |    |    |    |                            |    |    |    |    |  |  |  |  |  |      |  |  |  |
| Mouth manipulation   | Stooping           |                       |   |   |   |      |                     |   |   |   |    |                   |    |    |    |    |                   |    |    |    |    |                           |    |    |    |    |                                    |    |    |    |    |                            |    |    |    |    |  |  |  |  |  |      |  |  |  |
|                      | Agitation          |                       |   |   |   |      |                     |   |   |   |    |                   |    |    |    |    |                   |    |    |    |    |                           |    |    |    |    |                                    |    |    |    |    |                            |    |    |    |    |  |  |  |  |  |      |  |  |  |
|                      | Piloerection       |                       |   |   |   |      |                     |   |   |   |    |                   |    |    |    |    |                   |    |    |    |    |                           |    |    |    |    |                                    |    |    |    |    |                            |    |    |    |    |  |  |  |  |  |      |  |  |  |
|                      | Alarm              |                       |   |   |   |      |                     |   |   |   |    |                   |    |    |    |    |                   |    |    |    |    |                           |    |    |    |    |                                    |    |    |    |    |                            |    |    |    |    |  |  |  |  |  |      |  |  |  |
|                      | Motor activity     |                       |   |   |   |      |                     |   |   |   |    |                   |    |    |    |    |                   |    |    |    |    |                           |    |    |    |    |                                    |    |    |    |    |                            |    |    |    |    |  |  |  |  |  |      |  |  |  |
|                      | Stereotypes        |                       |   |   |   |      |                     |   |   |   |    |                   |    |    |    |    |                   |    |    |    |    |                           |    |    |    |    |                                    |    |    |    |    |                            |    |    |    |    |  |  |  |  |  |      |  |  |  |
|                      | ht leg movement    |                       |   |   |   |      |                     |   |   |   |    |                   |    |    |    |    |                   |    |    |    |    |                           |    |    |    |    |                                    |    |    |    |    |                            |    |    |    |    |  |  |  |  |  |      |  |  |  |
|                      | Head movement      |                       |   |   |   |      |                     |   |   |   |    |                   |    |    |    |    |                   |    |    |    |    |                           |    |    |    |    |                                    |    |    |    |    |                            |    |    |    |    |  |  |  |  |  |      |  |  |  |
|                      | Chewing            |                       |   |   |   |      |                     |   |   |   |    |                   |    |    |    |    |                   |    |    |    |    |                           |    |    |    |    |                                    |    |    |    |    |                            |    |    |    |    |  |  |  |  |  |      |  |  |  |
|                      | Proptosis          |                       |   |   |   |      |                     |   |   |   |    |                   |    |    |    |    |                   |    |    |    |    |                           |    |    |    |    |                                    |    |    |    |    |                            |    |    |    |    |  |  |  |  |  |      |  |  |  |
|                      | Narrowed eyes      |                       |   |   |   |      |                     |   |   |   |    |                   |    |    |    |    |                   |    |    |    |    |                           |    |    |    |    |                                    |    |    |    |    |                            |    |    |    |    |  |  |  |  |  |      |  |  |  |
|                      | Respiratory rate   |                       |   |   |   |      |                     |   |   |   |    |                   |    |    |    |    |                   |    |    |    |    |                           |    |    |    |    |                                    |    |    |    |    |                            |    |    |    |    |  |  |  |  |  |      |  |  |  |
|                      | Vocalizations      |                       |   |   |   |      |                     |   |   |   |    |                   |    |    |    |    |                   |    |    |    |    |                           |    |    |    |    |                                    |    |    |    |    |                            |    |    |    |    |  |  |  |  |  |      |  |  |  |
|                      | Tremors            |                       |   |   |   |      |                     |   |   |   |    |                   |    |    |    |    |                   |    |    |    |    |                           |    |    |    |    |                                    |    |    |    |    |                            |    |    |    |    |  |  |  |  |  |      |  |  |  |
| Seizures             |                    |                       |   |   |   |      |                     |   |   |   |    |                   |    |    |    |    |                   |    |    |    |    |                           |    |    |    |    |                                    |    |    |    |    |                            |    |    |    |    |  |  |  |  |  |      |  |  |  |
| Ataxia               |                    |                       |   |   |   |      |                     |   |   |   |    |                   |    |    |    |    |                   |    |    |    |    |                           |    |    |    |    |                                    |    |    |    |    |                            |    |    |    |    |  |  |  |  |  |      |  |  |  |
| Coordination         | View               |                       |   |   |   |      |                     |   |   |   |    |                   |    |    |    |    |                   |    |    |    |    |                           |    |    |    |    |                                    |    |    |    |    |                            |    |    |    |    |  |  |  |  |  |      |  |  |  |
|                      | Grip strength      |                       |   |   |   |      |                     |   |   |   |    |                   |    |    |    |    |                   |    |    |    |    |                           |    |    |    |    |                                    |    |    |    |    |                            |    |    |    |    |  |  |  |  |  |      |  |  |  |
|                      | Lighting reflex    |                       |   |   |   |      |                     |   |   |   |    |                   |    |    |    |    |                   |    |    |    |    |                           |    |    |    |    |                                    |    |    |    |    |                            |    |    |    |    |  |  |  |  |  |      |  |  |  |
|                      | Storatory activity |                       |   |   |   |      |                     |   |   |   |    |                   |    |    |    |    |                   |    |    |    |    |                           |    |    |    |    |                                    |    |    |    |    |                            |    |    |    |    |  |  |  |  |  |      |  |  |  |
| Manipulation         | Straub sign        |                       |   |   |   |      |                     |   |   |   |    |                   |    |    |    |    |                   |    |    |    |    |                           |    |    |    |    |                                    |    |    |    |    |                            |    |    |    |    |  |  |  |  |  |      |  |  |  |
|                      | Tail reflex        |                       |   |   |   |      |                     |   |   |   |    |                   |    |    |    |    |                   |    |    |    |    |                           |    |    |    |    |                                    |    |    |    |    |                            |    |    |    |    |  |  |  |  |  |      |  |  |  |
|                      | Intact reaction    |                       |   |   |   |      |                     |   |   |   |    |                   |    |    |    |    |                   |    |    |    |    |                           |    |    |    |    |                                    |    |    |    |    |                            |    |    |    |    |  |  |  |  |  |      |  |  |  |
|                      | Abdominal tone     |                       |   |   |   |      |                     |   |   |   |    |                   |    |    |    |    |                   |    |    |    |    |                           |    |    |    |    |                                    |    |    |    |    |                            |    |    |    |    |  |  |  |  |  |      |  |  |  |
|                      | Tremities tone     |                       |   |   |   |      |                     |   |   |   |    |                   |    |    |    |    |                   |    |    |    |    |                           |    |    |    |    |                                    |    |    |    |    |                            |    |    |    |    |  |  |  |  |  |      |  |  |  |
|                      | Aggressiveness     |                       |   |   |   |      |                     |   |   |   |    |                   |    |    |    |    |                   |    |    |    |    |                           |    |    |    |    |                                    |    |    |    |    |                            |    |    |    |    |  |  |  |  |  |      |  |  |  |
|                      | Pupul size         |                       |   |   |   |      |                     |   |   |   |    |                   |    |    |    |    |                   |    |    |    |    |                           |    |    |    |    |                                    |    |    |    |    |                            |    |    |    |    |  |  |  |  |  |      |  |  |  |
|                      | Grip strength      |                       |   |   |   |      |                     |   |   |   |    |                   |    |    |    |    |                   |    |    |    |    |                           |    |    |    |    |                                    |    |    |    |    |                            |    |    |    |    |  |  |  |  |  |      |  |  |  |
|                      | ail suspension     |                       |   |   |   |      |                     |   |   |   |    |                   |    |    |    |    |                   |    |    |    |    |                           |    |    |    |    |                                    |    |    |    |    |                            |    |    |    |    |  |  |  |  |  |      |  |  |  |
|                      | Acoustic reflex    |                       |   |   |   |      |                     |   |   |   |    |                   |    |    |    |    |                   |    |    |    |    |                           |    |    |    |    |                                    |    |    |    |    |                            |    |    |    |    |  |  |  |  |  |      |  |  |  |
| Others               | Lachrymation       |                       |   |   |   |      |                     |   |   |   |    |                   |    |    |    |    |                   |    |    |    |    |                           |    |    |    |    |                                    |    |    |    |    |                            |    |    |    |    |  |  |  |  |  |      |  |  |  |
|                      | Salivation         |                       |   |   |   |      |                     |   |   |   |    |                   |    |    |    |    |                   |    |    |    |    |                           |    |    |    |    |                                    |    |    |    |    |                            |    |    |    |    |  |  |  |  |  |      |  |  |  |
|                      | Unification        |                       |   |   |   |      |                     |   |   |   |    |                   |    |    |    |    |                   |    |    |    |    |                           |    |    |    |    |                                    |    |    |    |    |                            |    |    |    |    |  |  |  |  |  |      |  |  |  |
|                      | Defecation         |                       |   |   |   |      |                     |   |   |   |    |                   |    |    |    |    |                   |    |    |    |    |                           |    |    |    |    |                                    |    |    |    |    |                            |    |    |    |    |  |  |  |  |  |      |  |  |  |
|                      | Diarrhea           |                       |   |   |   |      |                     |   |   |   |    |                   |    |    |    |    |                   |    |    |    |    |                           |    |    |    |    |                                    |    |    |    |    |                            |    |    |    |    |  |  |  |  |  |      |  |  |  |
|                      | Vocalizations      |                       |   |   |   |      |                     |   |   |   |    |                   |    |    |    |    |                   |    |    |    |    |                           |    |    |    |    |                                    |    |    |    |    |                            |    |    |    |    |  |  |  |  |  |      |  |  |  |
| Others               | By temperature/    |                       |   |   |   |      |                     |   |   |   |    |                   |    |    |    |    |                   |    |    |    |    |                           |    |    |    |    |                                    |    |    |    |    |                            |    |    |    |    |  |  |  |  |  |      |  |  |  |
