# Supplementary material for: Evaluation in a Cytokine Storm Model In Vivo of the Safety and Efficacy of Intravenous Administration of PRS CK STORM (Standardized Conditioned Medium Obtained by Coculture of Monocytes and Mesenchymal Stromal Cells)
Source: MDPI journal article supplement (doi:10.3390/biomedicines10051094), 2022-05-08
Supplement: s1 [file s1]

**Table S3.** Values of murine cytokines analyzed by multiplex assay.

| <i>Sample</i>                | <i>HGF</i> | <i>TNF-<math>\alpha</math></i> | <i>IL-12 p70</i> | <i>IL-1<math>\beta</math></i> | <i>IL-6</i> | <i>IL-10</i> | <i>IFN-<math>\gamma</math></i> | <i>TIMP-1</i> |
|------------------------------|------------|--------------------------------|------------------|-------------------------------|-------------|--------------|--------------------------------|---------------|
| <i>18 Day 0</i>              | 3,542.422  | < 2.428                        | < 44.856         | < 230.206                     | < 25.226    | 0.877        | < 13.169                       | 1,087.913     |
| <i>19 Day 0</i>              | 4,660.284  | < 2.428                        | < 44.856         | < 230.206                     | 22.442      | 3.666        | < 13.169                       | 3,043.261     |
| <i>20 Day 0</i>              | 3,284.495  | 0.791                          | < 44.856         | < 230.206                     | < 25.226    | 3.145        | < 13.169                       | 3,732.711     |
| <i>21 Day 0</i>              | 5,752.083  | N/A                            | < 44.856         | N/A                           | 27.908      | 4.173        | < 13.169                       | 5,895.56      |
| <i>24 Day 0</i>              | 4,370.718  | < 2.428                        | < 44.856         | N/A                           | 103.602     | 4.432        | < 13.169                       | 2,778.284     |
| <i>28 Day 0</i>              | 4,512.387  | < 2.428                        | < 44.856         | N/A                           | 79.233      | 2.379        | < 13.169                       | 2,768.825     |
| <i>29 Day 0</i>              | 4,989.191  | < 2.428                        | < 44.856         | < 230.206                     | 19.664      | 3.916        | < 13.169                       | 2,847.3       |
| <i>30 Day 0</i>              | 5,653.182  | < 2.428                        | < 44.856         | < 230.206                     | 7.338       | 2.382        | < 13.169                       | 2,839.6       |
| <i>16</i>                    | 4,807.298  | 0.791                          | < 44.856         | < 230.206                     | < 25.226    | 2.125        | < 13.169                       | 2,300.744     |
| <i>17</i>                    | 4,337.892  | < 2.428                        | < 44.856         | N/A                           | < 25.226    | 1.875        | < 13.169                       | 3,669.097     |
| <i>18</i>                    | 5,000.635  | 0.953                          | < 44.856         | N/A                           | < 25.226    | 3.666        | < 13.169                       | 2,967.363     |
| <i>19</i>                    | 4,459.538  | < 2.428                        | < 44.856         | < 230.206                     | < 25.226    | 2.379        | < 13.169                       | 1,573.371     |
| <i>20</i>                    | 4,045.425  | < 2.428                        | < 44.856         | < 230.206                     | < 25.226    | 1.621        | < 13.169                       | 2,555.955     |
| <i>21</i>                    | 4,600.824  | < 2.428                        | < 44.856         | < 230.206                     | < 25.226    | 3.149        | < 13.169                       | 2,390.33      |
| <i>22</i>                    | 4,402.813  | N/A                            | < 44.856         | < 230.206                     | N/A         | 1.875        | < 13.169                       | 3,374.034     |
| <i>23</i>                    | 3,758.583  | < 2.428                        | < 44.856         | < 230.206                     | N/A         | 2.125        | < 13.169                       | 1,905.15      |
| <i>24</i>                    | 4,261.972  | < 2.428                        | < 44.856         | < 230.206                     | < 25.226    | 0.626        | < 13.169                       | 2,264.233     |
| <i>25</i>                    | 4,022.923  | 0.953                          | < 44.856         | < 230.206                     | < 25.226    | 0.869        | < 13.169                       | 1,867.89      |
| <i>26</i>                    | 5,230.300  | N/A                            | < 44.856         | N/A                           | < 25.226    | 2.635        | < 13.169                       | 1,199.275     |
| <i>27</i>                    | 3,782.830  | < 2.428                        | < 44.856         | < 230.206                     | N/A         | 3.145        | < 13.169                       | 6,654.346     |
| <i>28</i>                    | 4,008.266  | 0.610                          | < 44.856         | 58.627                        | < 25.226    | 2.125        | < 13.169                       | 3,931.319     |
| <i>29</i>                    | 4,461.430  | < 2.428                        | < 44.856         | < 230.206                     | < 25.226    | 2.125        | < 13.169                       | 2,061.139     |
| <i>30</i>                    | 3,660.711  | < 2.428                        | < 44.856         | < 230.206                     | 55.308      | 3.659        | < 13.169                       | 2,659.215     |
| <i>Limit detection value</i> | UNK        | 2.428                          | 44.856           | 230.206                       | 25.226      | UNK          | 13.169                         | UNK           |

Values "< X" are under limit detection and are represented in the graphics as that "X" exact number. N/A means that the value is either non valid or under detection limit; therefore, it was represented as half the detection limit value for each cytokine/growth factor
