# Supplementary material for: Evaluation in a Cytokine Storm Model In Vivo of the Safety and Efficacy of Intravenous Administration of PRS CK STORM (Standardized Conditioned Medium Obtained by Coculture of Monocytes and Mesenchymal Stromal Cells)
Source: MDPI journal article supplement (doi:10.3390/biomedicines10051094), 2022-05-08
Supplement: s1 [file s1]

**Table S1.** Molecular characterization of PRS CK STORM batch used in this experiment.

| Concentration (pg/ml)     | PRS CK STORM |               |             |
|---------------------------|--------------|---------------|-------------|
|                           | High Dose    | Moderate Dose | Low Dose    |
| <b>BDNF</b>               | 7.81         | 3.9025        | 1.95125     |
| <b>EGF</b>                | -            | -             | -           |
| <b>Eotaxin (CCL11)</b>    | 14.59        | 7.295         | 3.6475      |
| <b>FGF-2</b>              | 26.10        | 13.05         | 6.525       |
| <b>GM-CSF</b>             | 7.14         | 3.57          | 1.785       |
| <b>GRO alpha (CXCL1)</b>  | 623.94       | 311.9675      | 155.98375   |
| <b>HGF</b>                | 845.36       | 422.68        | 211.34      |
| <b>IFN alpha</b>          | 0.05         | 0.025         | 0.0125      |
| <b>IFN gamma</b>          | -            | -             | -           |
| <b>IL-1 alpha</b>         | 2.06         | 1.03          | 0.515       |
| <b>IL-1 beta</b>          | 2.96         | 1.48          | 0.74        |
| <b>IL-1RA</b>             | 57,992.28    | 28,996.1375   | 14,498.0688 |
| <b>IL-2</b>               | 6.74         | 3.37          | 1.685       |
| <b>IL-4</b>               | 4.54         | 2.2675        | 1.13375     |
| <b>IL-5</b>               | 6.76         | 3.38          | 1.69        |
| <b>IL-6</b>               | 957.12       | 478.5575      | 239.27875   |
| <b>IL-7</b>               | 0.13         | 0.0625        | 0.03125     |
| <b>IL-8 (CXCL8)</b>       | 4,354.24     | 2,177.1175    | 1,088.55875 |
| <b>IL-9</b>               | 0.06         | 0.03          | 0.015       |
| <b>IL-10</b>              | 0.24         | 0.1175        | 0.05875     |
| <b>IL-12p70</b>           | 0.12         | 0.06          | 0.03        |
| <b>IL-13</b>              | -            | -             | -           |
| <b>IL-15</b>              | -            | -             | -           |
| <b>IL-17A (CTLA-8)</b>    | -            | -             | -           |
| <b>IL-18</b>              | 7.95         | 3.975         | 1.9875      |
| <b>IL-21</b>              | -            | -             | -           |
| <b>IL-22</b>              | -            | -             | -           |
| <b>IL-23</b>              | -            | -             | -           |
| <b>IL-27</b>              | -            | -             | -           |
| <b>IL-31</b>              | -            | -             | -           |
| <b>IP-10 (CXCL10)</b>     | 77.49        | 38.745        | 19.3725     |
| <b>LIF</b>                | 96.69        | 48.3425       | 24.17125    |
| <b>MCP-1 (CCL2)</b>       | 2,693.36     | 1,346.68      | 673.34      |
| <b>MIP-1 alpha (CCL3)</b> | 12.13        | 6.0625        | 3.03125     |
| <b>MIP-1 beta (CCL4)</b>  | 421.19       | 210.595       | 105.2975    |
| <b>NGF beta</b>           | 0.67         | 0.335         | 0.1675      |
| <b>PDGF-BB</b>            | -            | -             | -           |
| <b>PIGF-1</b>             | 69.71        | 34.855        | 17.4275     |
| <b>RANTES (CCL5)</b>      | 28.87        | 14.435        | 7.2175      |
| <b>SCF</b>                | 3.46         | 1.7275        | 0.86375     |
| <b>SDF-1 alpha</b>        | 1,608.00     | 804           | 402         |
| <b>TNF alpha</b>          | 11.62        | 5.81          | 2.905       |

|                 |             |             |             |
|-----------------|-------------|-------------|-------------|
| <b>TNF beta</b> | 2.47        | 1.235       | 0.6175      |
| <b>VEGF-A</b>   | 1,980.66    | 990.3275    | 495.16375   |
| <b>VEGF-D</b>   | 0.14        | 0.07        | 0.035       |
| <b>IGF-1</b>    | 1,675.1276  | 837.5638    | 418.7819    |
| <b>TIMP-1</b>   | 59,485.2725 | 29,742.6362 | 14,871.3181 |
| <b>IL-6SR</b>   | 18.1163691  | 9.05818457  | 4.52909228  |
| <b>MMP-1</b>    | 20,593.5698 | 10,296.7849 | 5,148.39246 |

Values don't showed are under limit detection
