# Supplementary material for: Evaluation in a Cytokine Storm Model In Vivo of the Safety and Efficacy of Intravenous Administration of PRS CK STORM (Standardized Conditioned Medium Obtained by Coculture of Monocytes and Mesenchymal Stromal Cells)
Source: Biomedicines. 2022 May 8;10(5):1094. doi: 10.3390/biomedicines10051094 (PMC9138962; doi:10.3390/biomedicines10051094)
Supplement: Supplementary file 1 [file biomedicines-10-01094-s001.zip]

Archive with 5 entries (5 files):
- Tabla S4.pdf
- Table S1.pdf
- Table S2.pdf
- Table S3.pdf
- Table S5.pdf
